# Supplementary material for: Silencing of lncRNA XIST impairs angiogenesis and exacerbates cerebral vascular injury after ischemic stroke
Source: PubMed Central journal article supplement — Mol Ther Nucleic Acids. 2021 Jul 16;26:148–60. doi: 10.1016/j.omtn.2021.06.025 (PMC8413678; doi:10.1016/j.omtn.2021.06.025), 2021-07-16
Supplement: mmc1.pdf [file mmc1.pdf]

**OMTN, Volume 26**

**Supplemental information**

**Silencing of lncRNA XIST impairs  
angiogenesis and exacerbates cerebral  
vascular injury after ischemic stroke**

**Cong Wang, Jing Dong, Jinru Sun, Shu Huang, Feifei Wu, Xinyu Zhang, Defang Pang, Yuan Fu, and Longxuan Li**

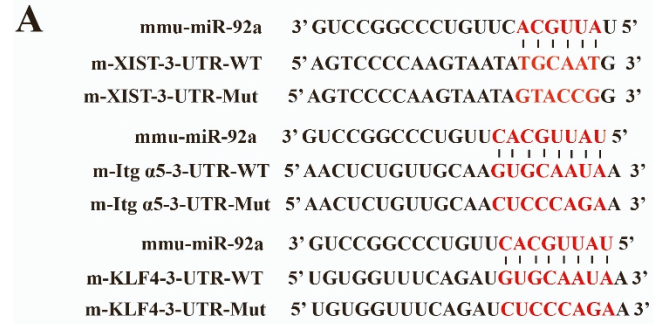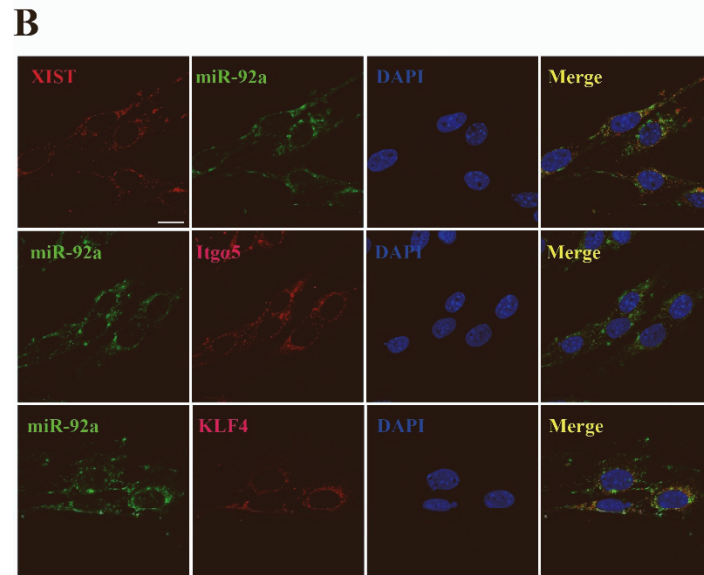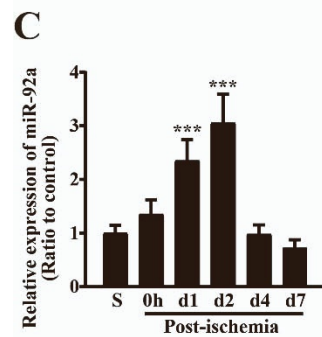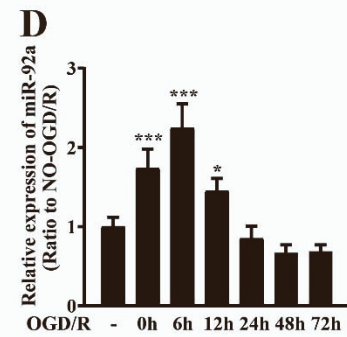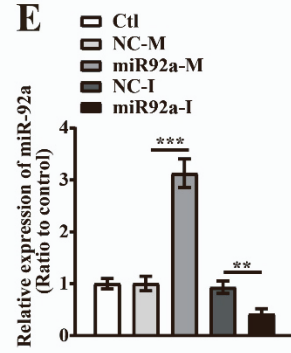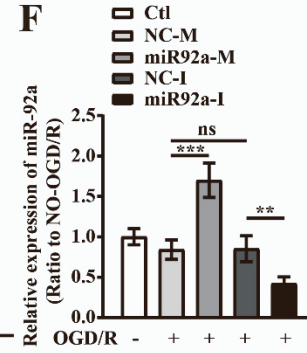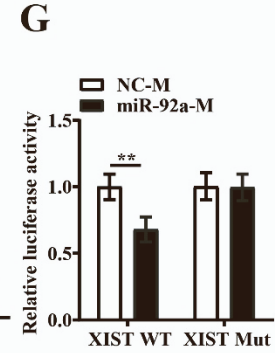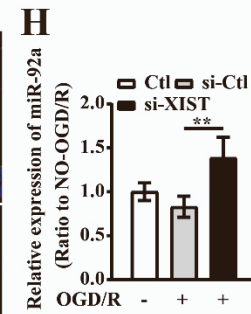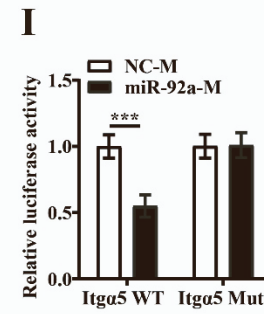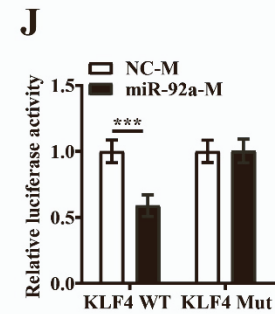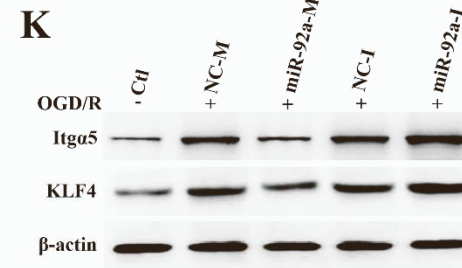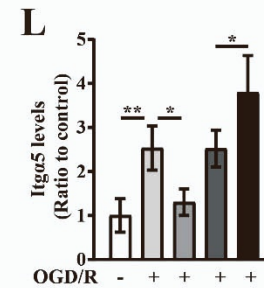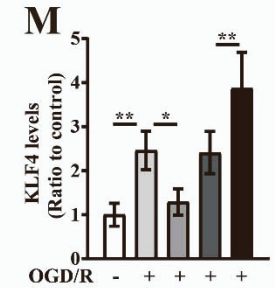

**Figure S1. The cellular localization and interactive relationship between lncRNA XIST, miR-92a and Itga5 or KLF4**

**A**, Predicted binding sites of lncRNA XIST with miR-92a, and miR-92a with Itga5 or KLF4. **B**, RNA FISH assay showed that lncRNA XIST colocalized with miR-92a and miR-92a had a colocalization relationship with Itga5 or KLF4 in bEnd3 cells. **C**, The expression of miR-92a in the ipsilateral ischemic cerebral cortex from sham-operated mice (S, control) or mice at days 0, 1, 2, 4, and 7 post-ischemia was examined by qPCR. Results are expressed as the mean  $\pm$  standard deviation (n =6 per experimental group). Note that cerebral ischemia induced a strong increase in the expression of miR-92a in the ischemic hemisphere, reaching a peak at day 2 and then declining at day 4. \*\*\* $P < 0.001$  compared with sham control. **D**, qRT-PCR analysis for miR-92a levels after BECs was subject to OGD/R. Results are expressed as the mean  $\pm$  standard deviation (n =4 per experimental group). Note that OGD/R induced a significant increase in the expression of miR-92a in bEnd3 cells, with this effect maximal 6 h post-restoration. \* $P < 0.05$ , \*\* $P < 0.01$ , \*\*\* $P < 0.001$  compared with control. **E&F**, Upregulation or downregulation of miR-92a was achieved by transfection with miR-92a mimics (miR-92a-M) or inhibitors (miR-92a-I) in bEnd3 cells in normoxia (E) or at 24 h restoration from OGD (F) and the efficiency were validated by RT-qPCR. \*\* $P < 0.01$ , \*\*\* $P < 0.001$ ; ns, not significant. **G**, Dual-luciferase report assay was conducted to detect luciferase activity after co-transfection of HEK293T cells with XIST-wild type (WT) or XIST-mutant (Mut) and normal control mimics (NC-M), miR-92a-M. \*\* $P < 0.01$ , n=4. **H**, miR-92a expression was measured using qRT-PCR after transfection with si-Ctl or si-XIST at 24 h restoration from OGD. Results are expressed as the mean  $\pm$  standard deviation (n =4 per experimental group). Note that miR-92a levels were significantly elevated in si-XIST-treated cells as compared to that of the si-Ctl-treated cells after 24 h restoration. \*\* $P < 0.01$ .

**I&J**, Dual-luciferase report assay revealed that miR-92a mimic (miR-92a-M) reduced the luciferase activity of Itg $\alpha$ 5-WT (I) or KLF4-WT (J), but not of Itg $\alpha$ 5-Mut (I) or KLF4 Mut (J). \*\*\* $P$ <0.001, n=4. **K**, The expression of Itg $\alpha$ 5 and KLF4 was measured using western blot in bEnd3 cells transfected with miR-92a-M or miR-92a-I at 24 h restoration from OGD. **L-M**, Bar graphs show the quantitative analyses of western blots as ratios of Itg $\alpha$ 5/ $\beta$ -actin (**L**) and KLF4/ $\beta$ -actin (**M**) (n=4 per experimental group). Note that overexpression of miR-92a (miR-92a-M) decreased, but inhibition of miR-92a (miR-92a-I) increased the expression of Itg $\alpha$ 5 and KLF4 in the bEnd3 cells at 24 h restoration from OGD. \* $P$ <0.05, \*\* $P$ <0.01

**Supplementary Table 1. Baseline clinical characteristics of acute stroke patients and healthy controls**

| <b>Characteristics</b>                | <b>Controls<br/>(n=60)</b> | <b>CIS<br/>(n=77)</b> | <b>P<br/>value</b> |
|---------------------------------------|----------------------------|-----------------------|--------------------|
| Age mean $\pm$ SD (years)             | 67.52 $\pm$ 11.43          | 68.19 $\pm$ 12.25     | 0.744              |
| Sex Male n (%)                        | 31 (51.67 %)               | 41 (53.25%)           | 0.865              |
| Hypercholesterolemia n (%)            | 16 (26.67 %)               | 39 (50.65 %)          | <b>0.005</b>       |
| Hypertension n (%)                    | 28 (46.67 %)               | 53 (68.83 %)          | <b>0.014</b>       |
| Diabetes n (%)                        | 5 (8.33 %)                 | 21 (27.27 %)          | <b>0.008</b>       |
| Active Smoker n (%)                   | 12 (20 %)                  | 23 (29.87 %)          | 0.237              |
| Alcohol n (%)                         | 10 (16.67 %)               | 16 (20.78%)           | 0.662              |
| Atrial fibrillation n (%)             | 5 (8.33 %)                 | 23 (29.87 %)          | <b>0.002</b>       |
| Coronary disease n (%)                | -                          | 13 (16.88 %)          | -                  |
| Previous antiplatelet treatment n (%) | 14 (23.33 %)               | 24 (31.17 %)          | 0.341              |
| Previous treatment with statin n (%)  | 15 (25 %)                  | 28 (36.36 %)          | 0.195              |

Values are shown as number (%), mean  $\pm$  standard deviation (SD).
